# Supplementary material for: Cockayne syndrome mice reflect human kidney disease and are defective in de novo NAD biosynthesis
Source: Research Square preprint supplement (doi:10.21203/rs.3.rs-4882865/v1), 2024-10-10
Supplement: Supplementary file 1 [file 950d22942c9ef705bb4792dc.pdf]

# Cockayne syndrome mice reflect human kidney disease and are defective in *de novo* NAD biosynthesis

Komal Pekhale<sup>1,2</sup>, Vinod Tiwari<sup>1</sup>, Tomasz Kulikowicz<sup>1</sup>, Christy C. Bridges<sup>3</sup>, Deborah L. Croteau<sup>1,4</sup>, Moshe Levi<sup>5</sup>, Xiaoxin X. Wang<sup>5</sup>, Jong-Hyuk Lee<sup>1,3,\*,#</sup>, and Vilhelm A. Bohr<sup>1,6,7,\*,#</sup>

<sup>1</sup>DNA repair section, National Institute on Aging, National Institutes of Health, Baltimore, MD 21224;

<sup>2</sup>Cecil H. and Ida Green Center for Reproductive biology Sciences, University of Texas Southwestern Medical Center, Dallas, TX 75390;

<sup>3</sup>Department of Biomedical Sciences, Mercer University School of Medicine, Savannah, GA 31404;

<sup>4</sup>Laboratory of Genetics and Genomics, National Institute on Aging, National Institutes of Health, Baltimore, MD 21224;

<sup>5</sup>Biochemistry and Molecular & Cellular Biology, Georgetown University Medical Center, Washington, DC, United States.

<sup>6</sup>Danish Center for Healthy Aging, University of Copenhagen, 2200 Copenhagen, Denmark;

<sup>7</sup>Lead Contact

## Supplementary Data

A

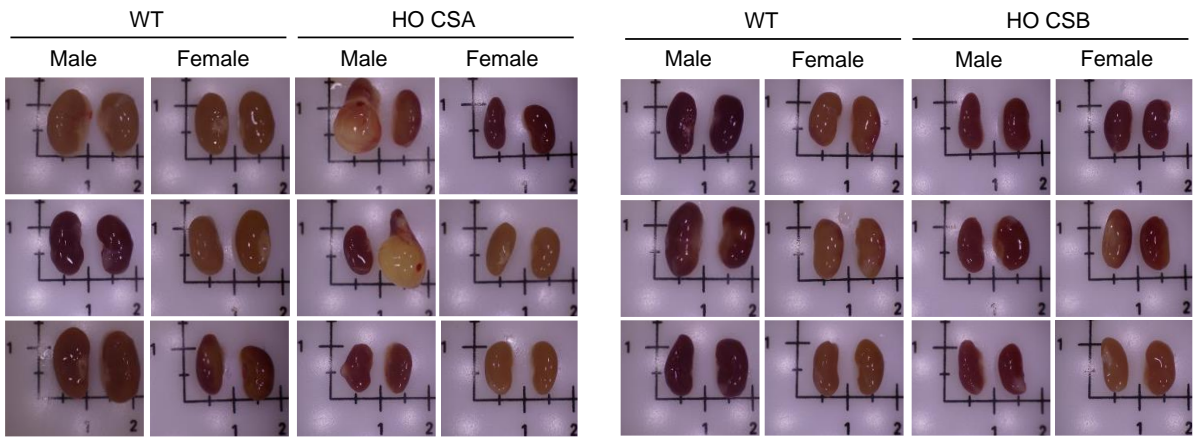

B

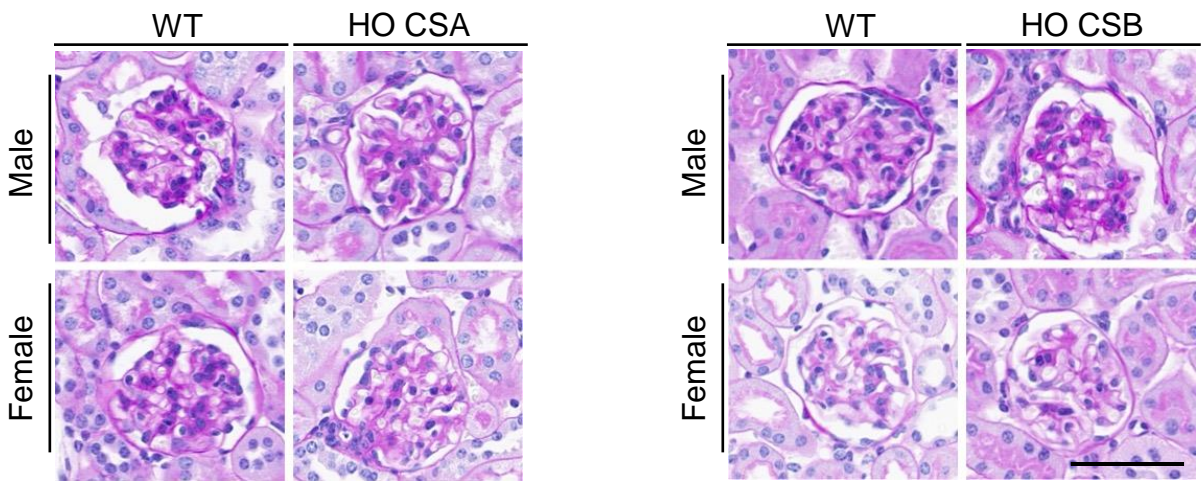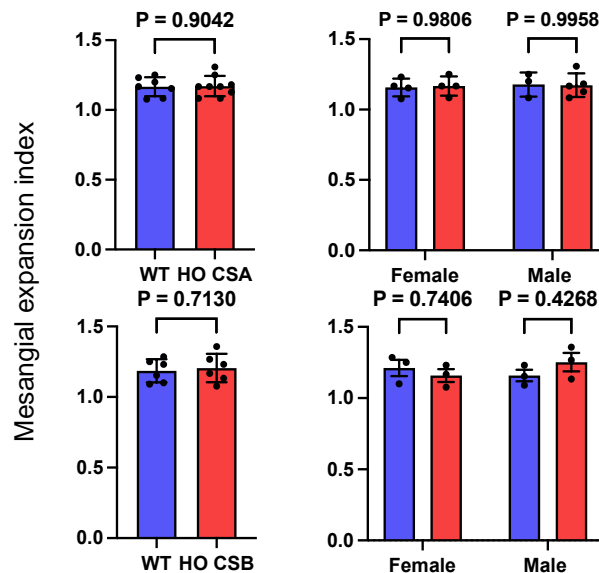

## Supplementary Figure S1

(A) Kidneys were removed from 45-86 weeks-old mice at termination and directly compared. (WT= wildtype; HO=Homozygous; M= Male; F= Female) Background scale  $\times 10$  mm. (B) Representative image of PAS staining in CS mice. Scale bar, 50  $\mu$ m. The mesangial expansion index is defined as the ratio of the mesangial area to the glomerular tuft area. The mesangial area is measured by assessing the PAS-positive, nucleus-free regions within the mesangium. Data are presented as mean  $\pm$  SD ( $n \geq 3$ ). An unpaired t-test was used for comparing CS with WT. A two-way ANOVA Sidak test was used for the comparisons between males and females. p-values indicated (Blue bar, WT; Red bar, HO CSA/CSB).

Blood urea nitrogen (mg/dL)

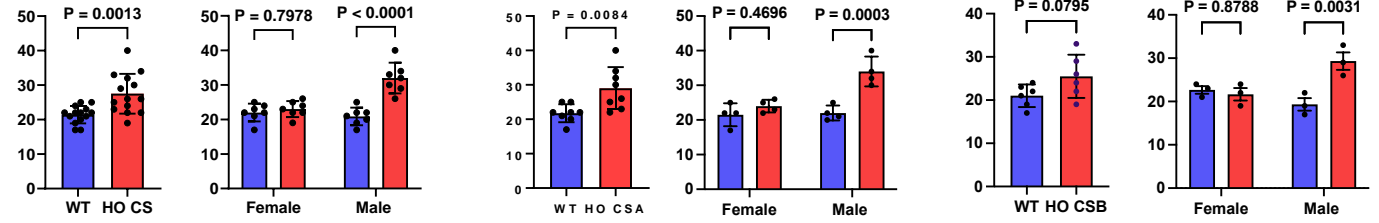

Serum creatinine (mg/dL)

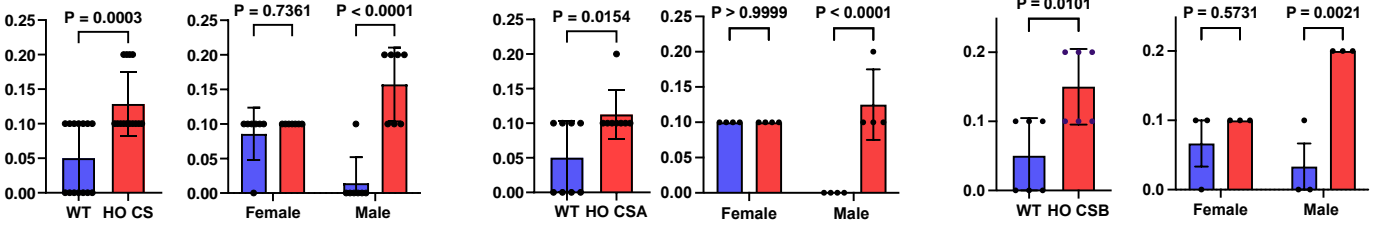

Serum phosphorous (mg/dL)

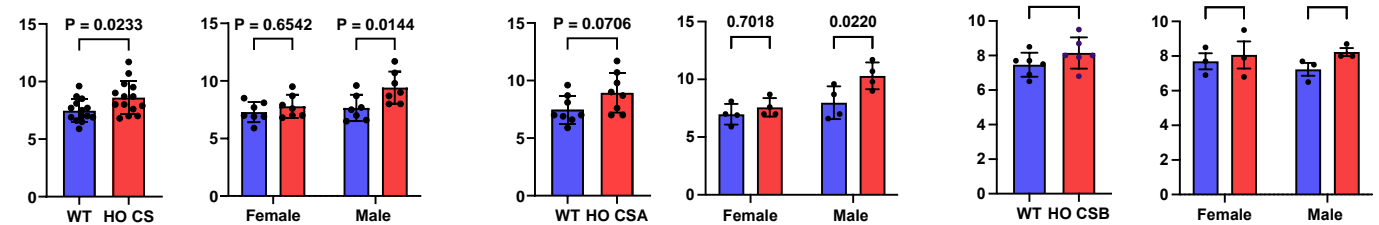

Serum cholesterol (mg/dL)

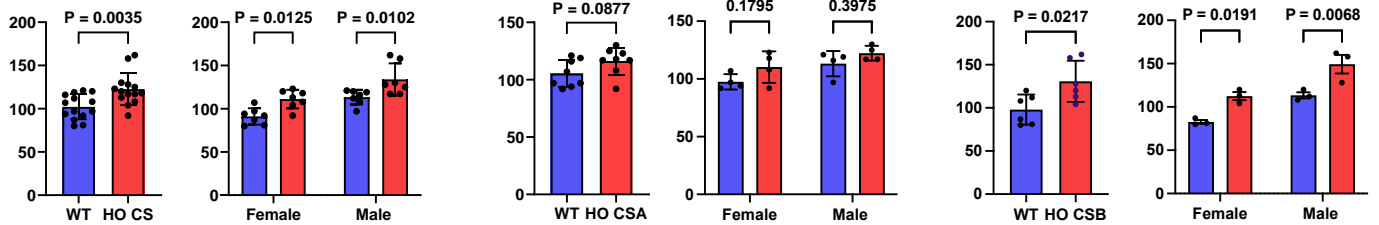

Serum chloride (mmol/L)

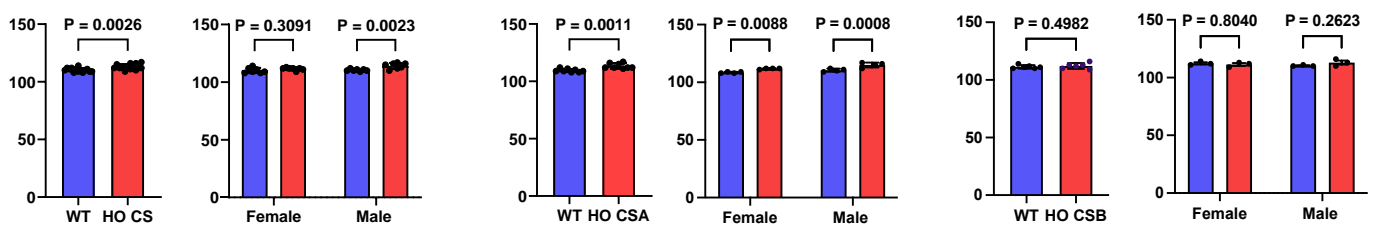

Serum potassium (mmol/L)

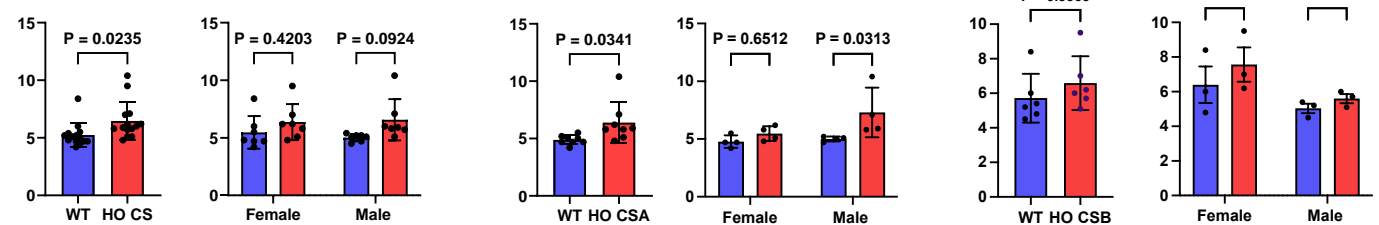

Serum uric acid (mg/dL)

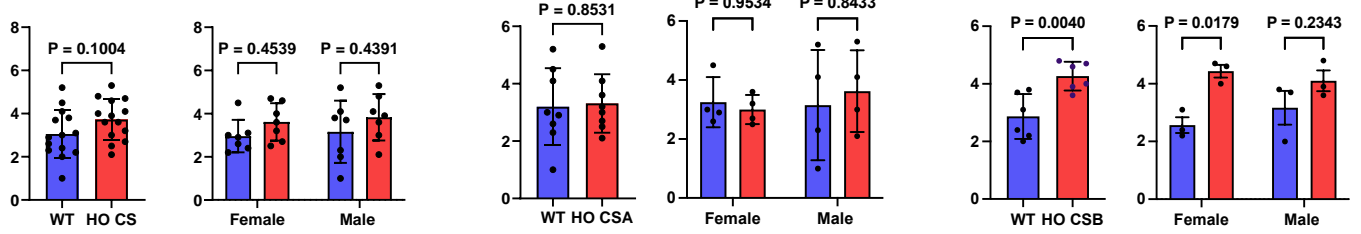

Serum albumin (g/dL)

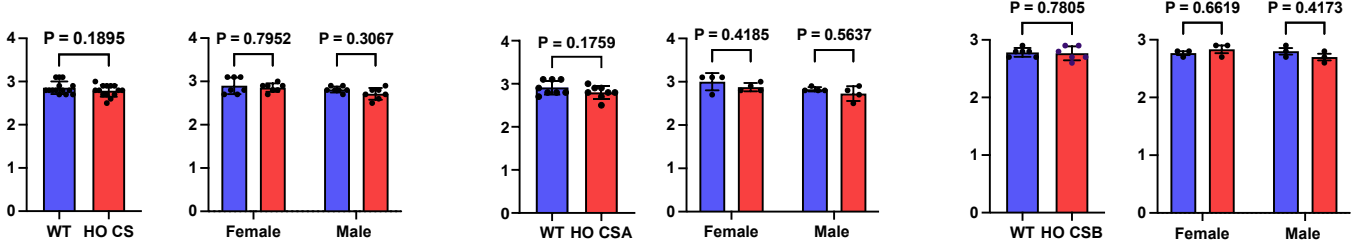

Serum sodium (mmol/L)

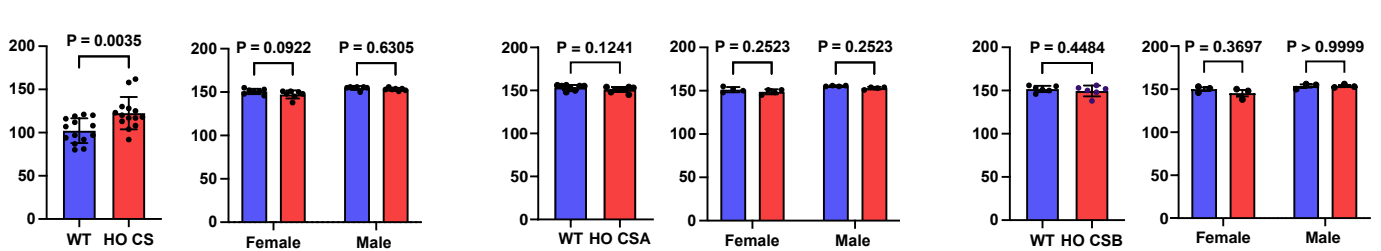

Serum calcium (mg/dL)

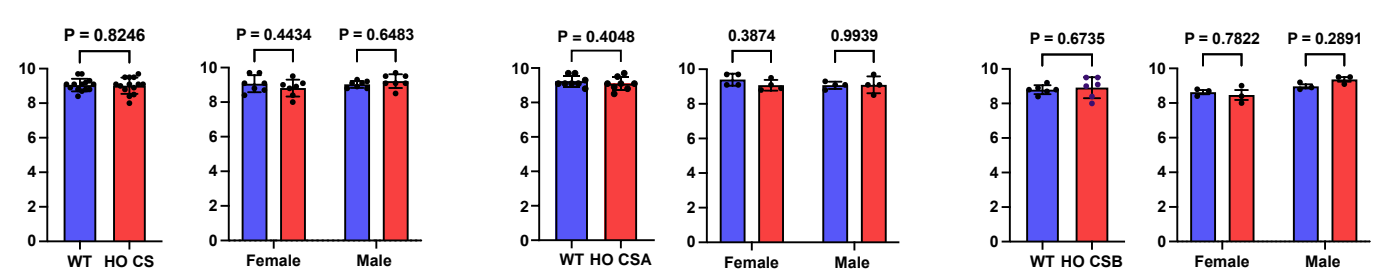

Serum total protein (g/dL)

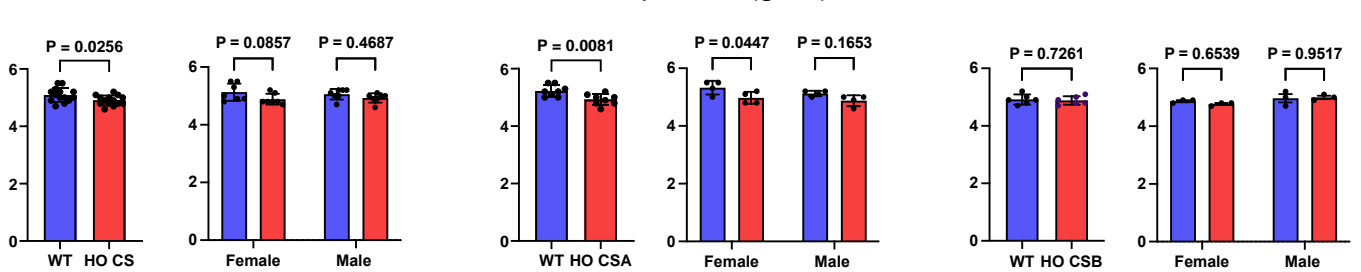

Supplementary Figure S2

Serum isolated from the whole blood samples of the WT and CS mice were collected and analyzed for the parameters indicated. Data presented as mean  $\pm$  SD ( $N \geq 3$ ), Unpaired t-test was used for comparing CS with WT. Two-way ANOVA test used for male vs female comparison. P-values indicated (Blue bar, WT; Red bar, HO CSA/CSB).

A

## Serum Havcr1 (pg/ml)

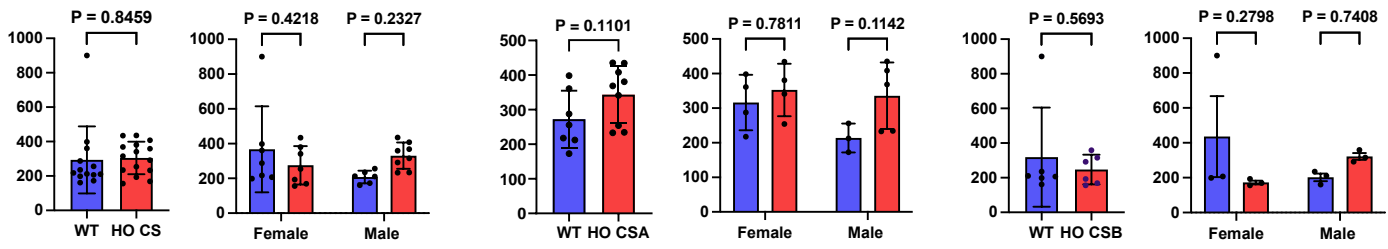

## Serum Lcn2 (pg/ml)

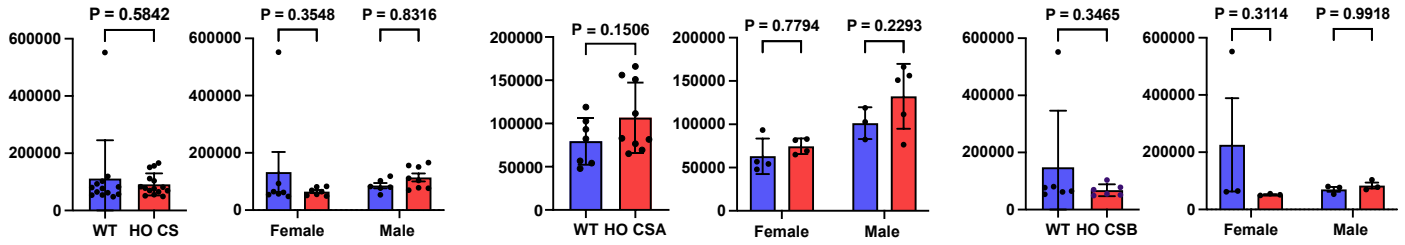

## Serum Cst3 (pg/ml)

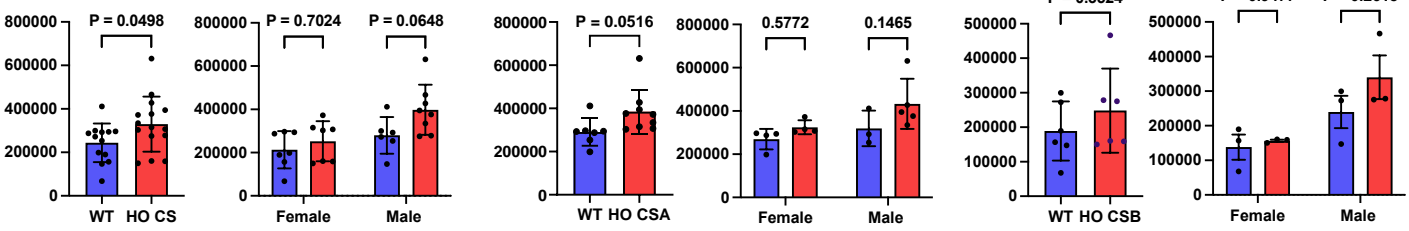

## Serum Clu (pg/ml)

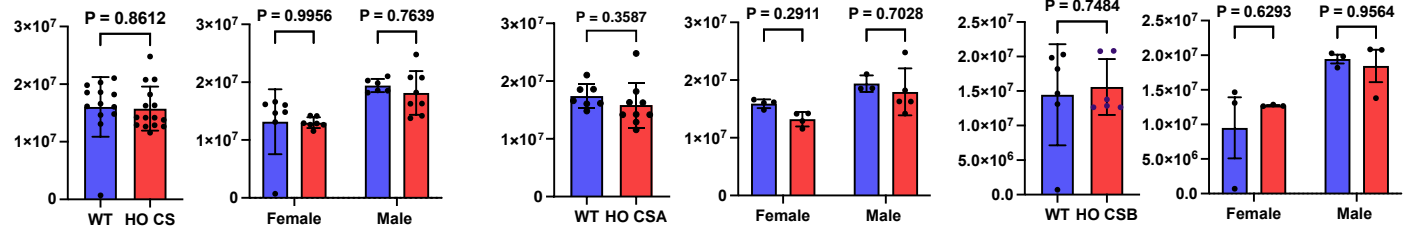

## Serum Spp1 (pg/ml)

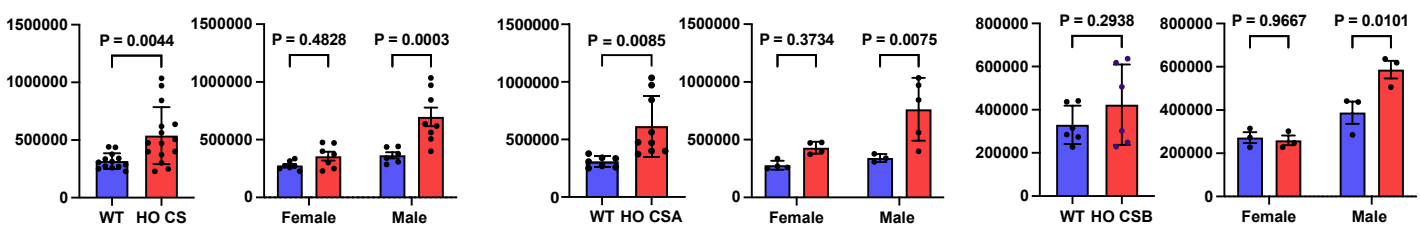

B

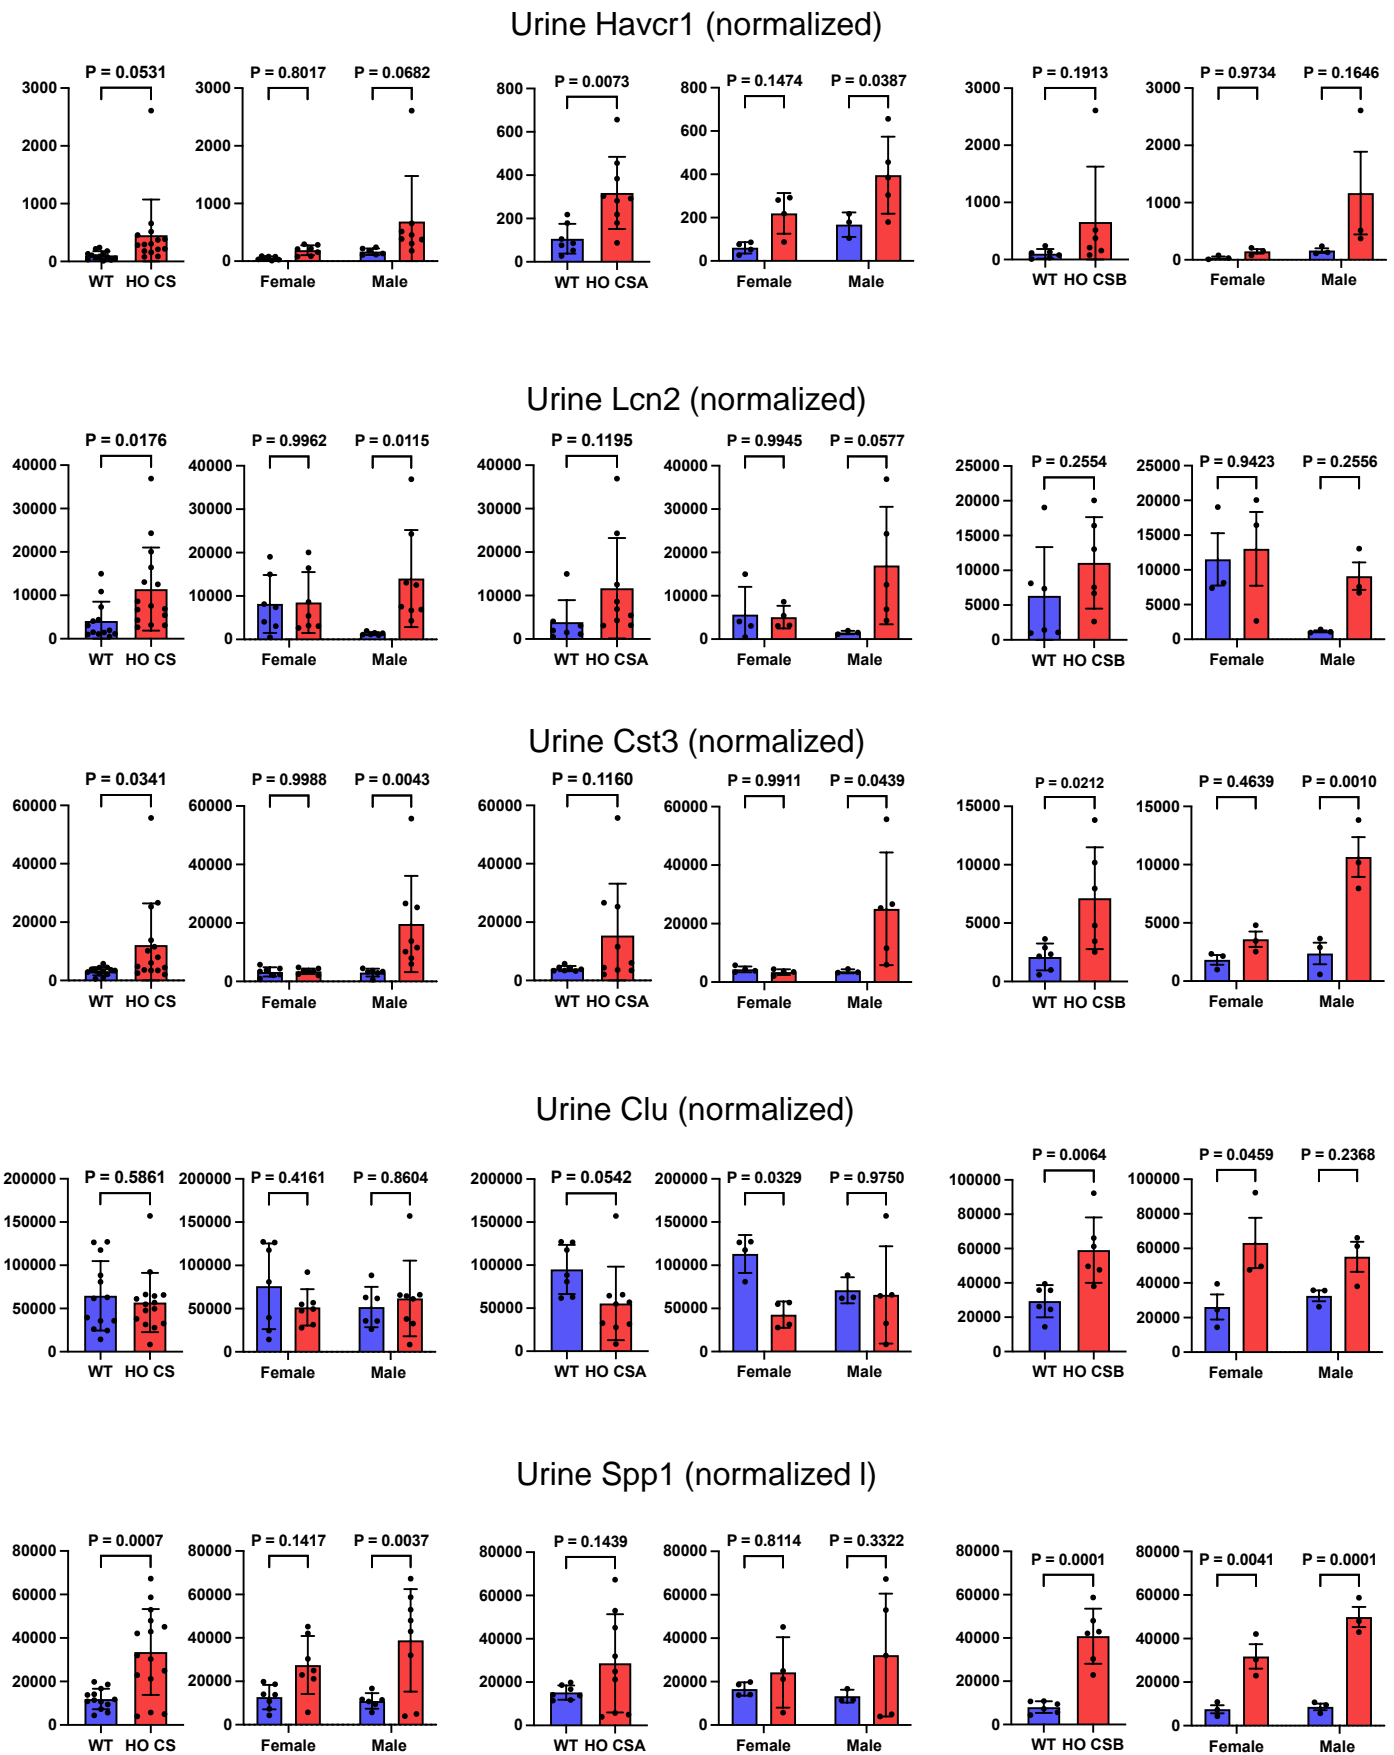

## Supplementary Figure S3

Measurement of (A) kidney toxicity markers in serum and (B) Creatinine normalized urine values of CS mice. Data shown as mean  $\pm$  SD ( $N \geq 3$ ), Unpaired t-test was used for comparing CS with WT. Two-way ANOVA test used for male vs female comparison. P-values (Blue bar, WT; Red bar, HO CSA/CSB).

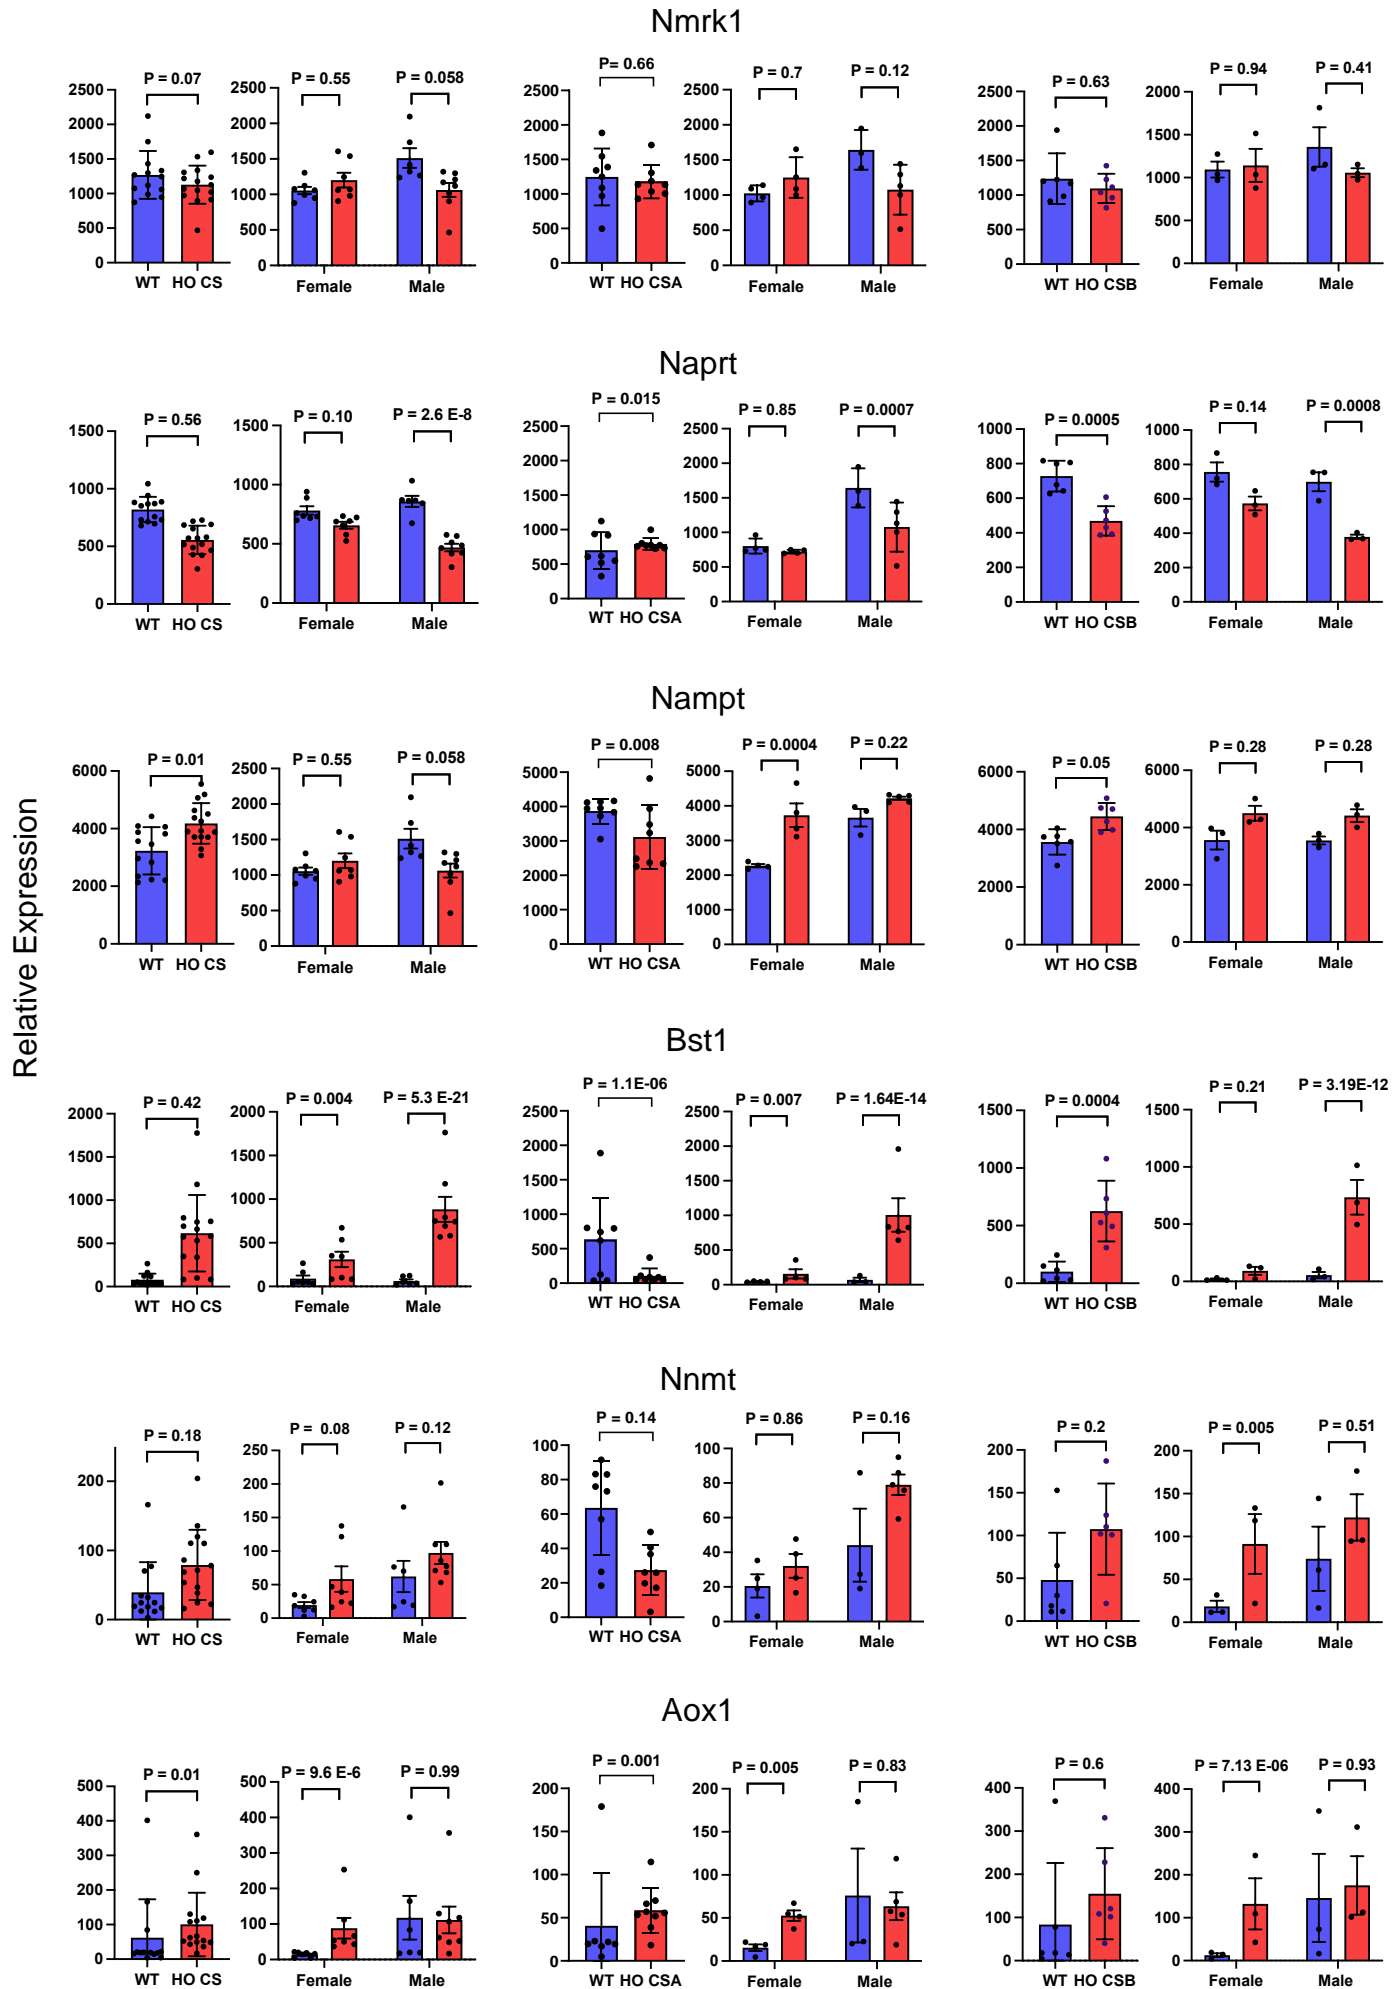

## Aox2

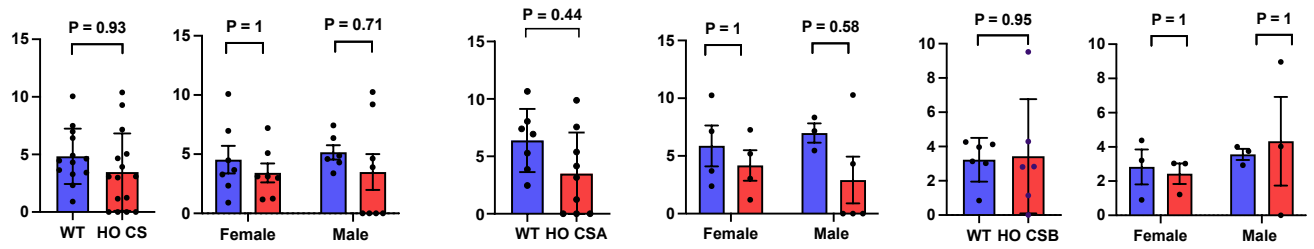

## Aox3

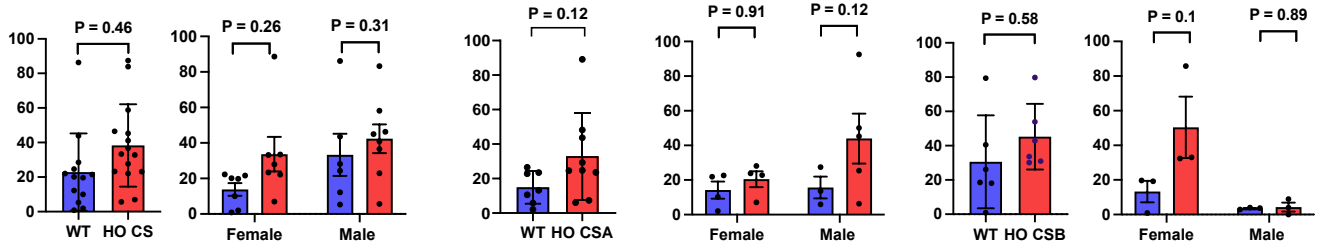

## Aox4

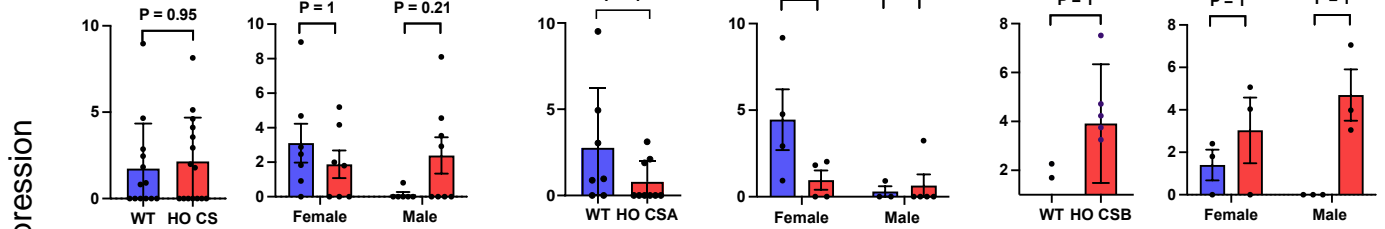

## Nmnat1

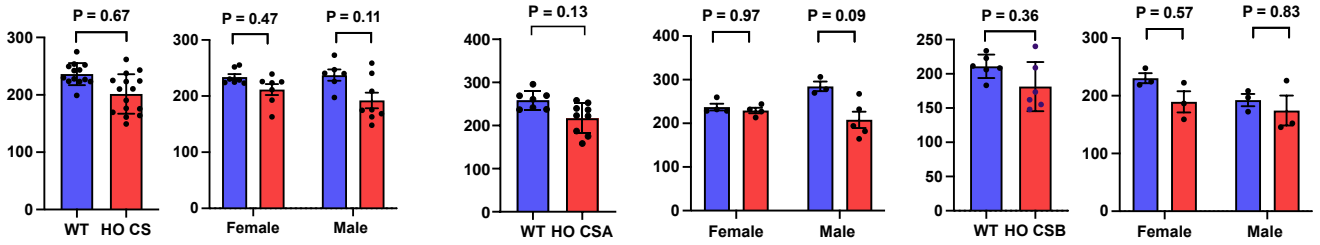

## Nmnat2

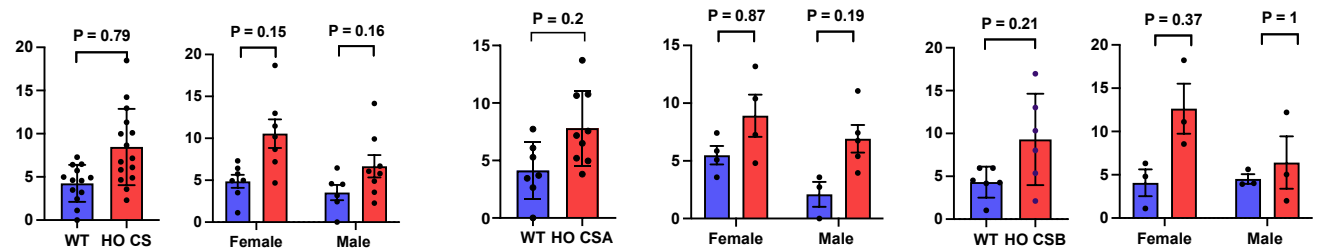

## Nmnat3

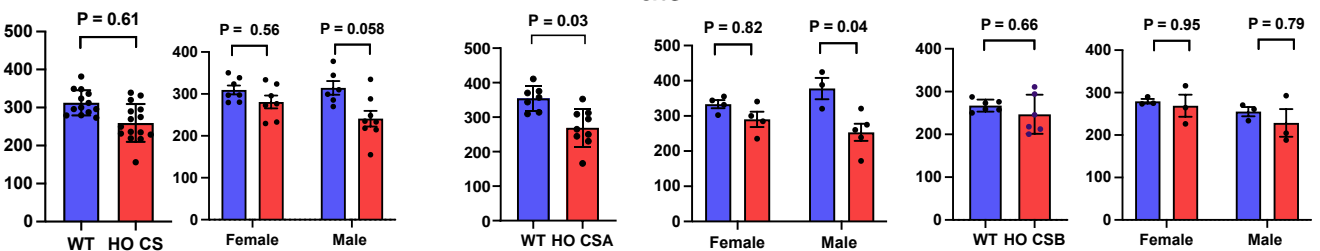

## Supplementary Figure S4

Expression of genes in 'Nicotinate and Nicotinamide metabolism' panel from DEGs of WT and CS mice kidney RNA-sequencing analysis. P-adjusted values indicated (Blue bar, WT; Red bar, HO CSA/CSB).

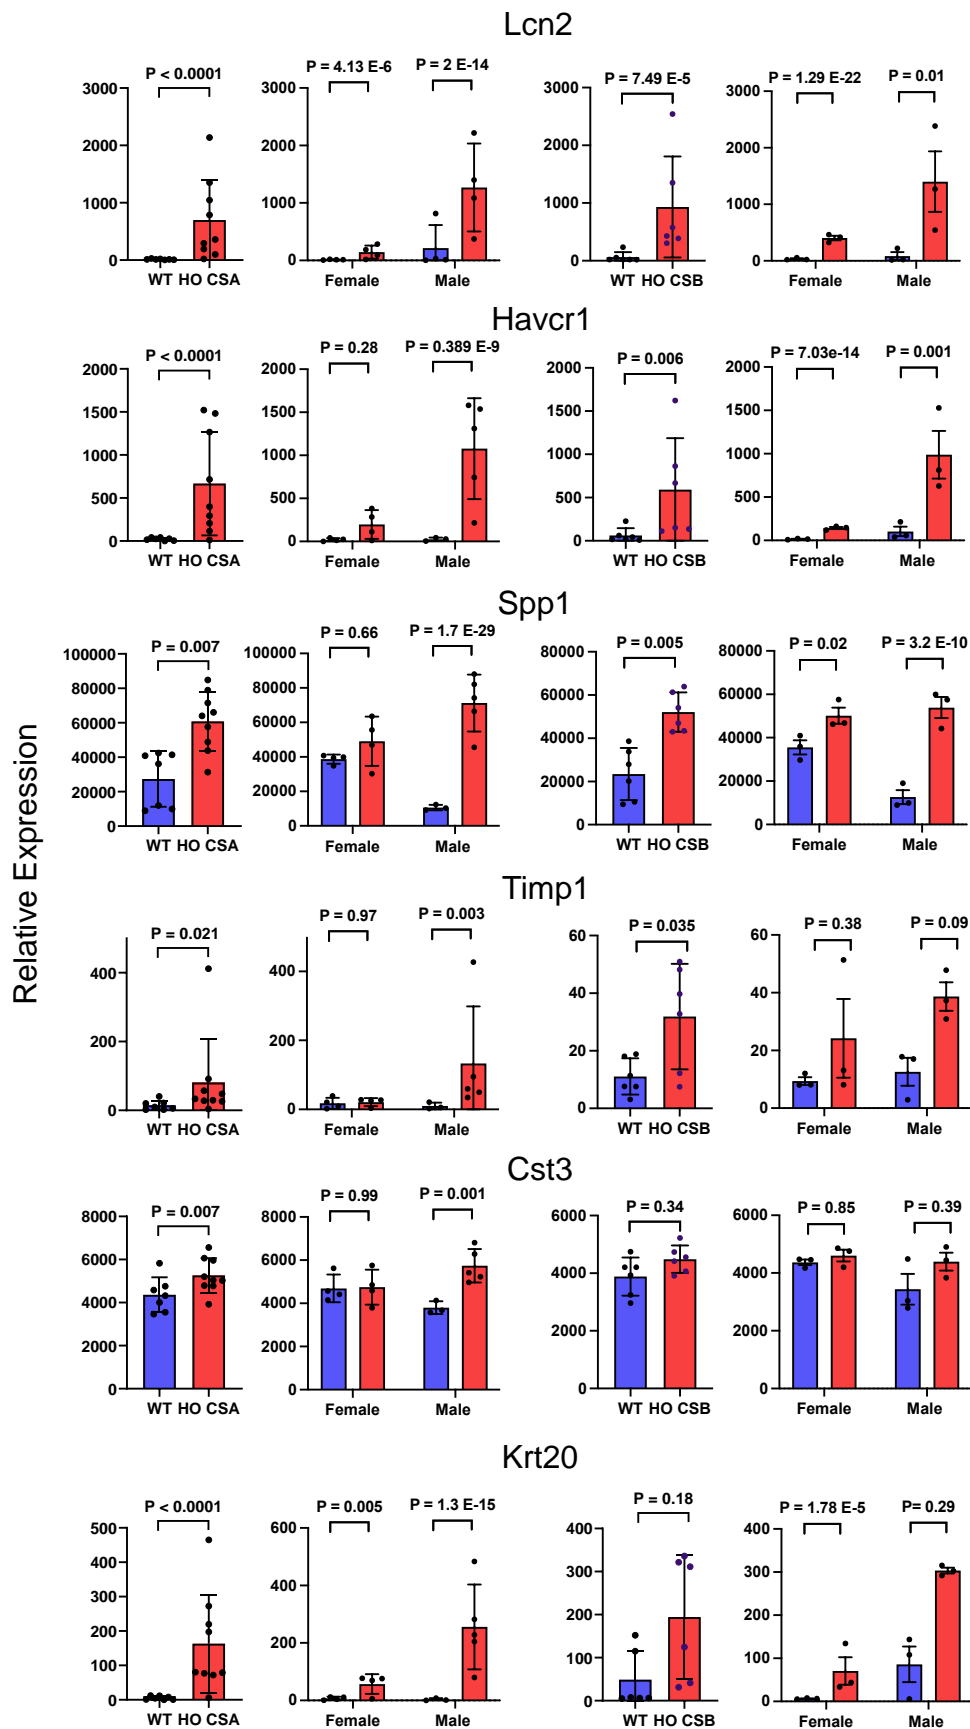

Supplementary Figure S5

Expression of kidney toxicity markers in kidney from DEGs of WT and CS mice kidney RNA-sequencing analysis. P adjusted-values indicated (Blue bar, WT; Red bar, HO CSA/CSB).

NAD<sup>+</sup> (ng/mg protein)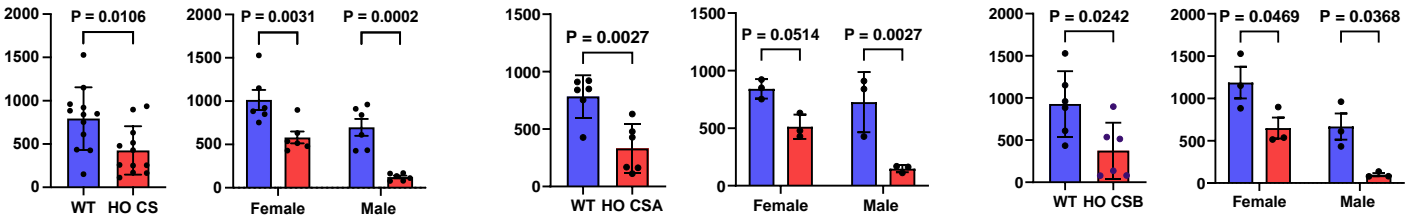NAD<sup>+</sup>/NADH (ratio)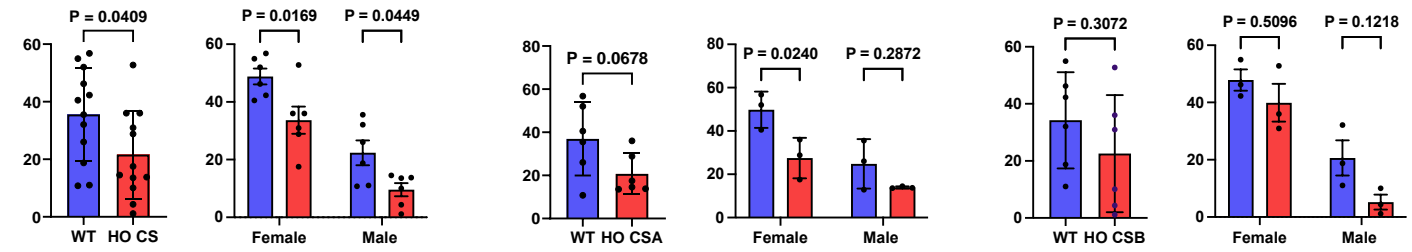

## Supplementary Figure S6

Measurement of NAD<sup>+</sup> and NAD/NADH levels in WT and CS mice kidneys. Data are shown as mean  $\pm$  SD (N $\geq$ 3), Unpaired t-test was used for comparing CS with WT. Two-way ANOVA test used for male vs female comparison. P-values indicated (Blue bar, WT; Red bar, HO CSA/CSB).

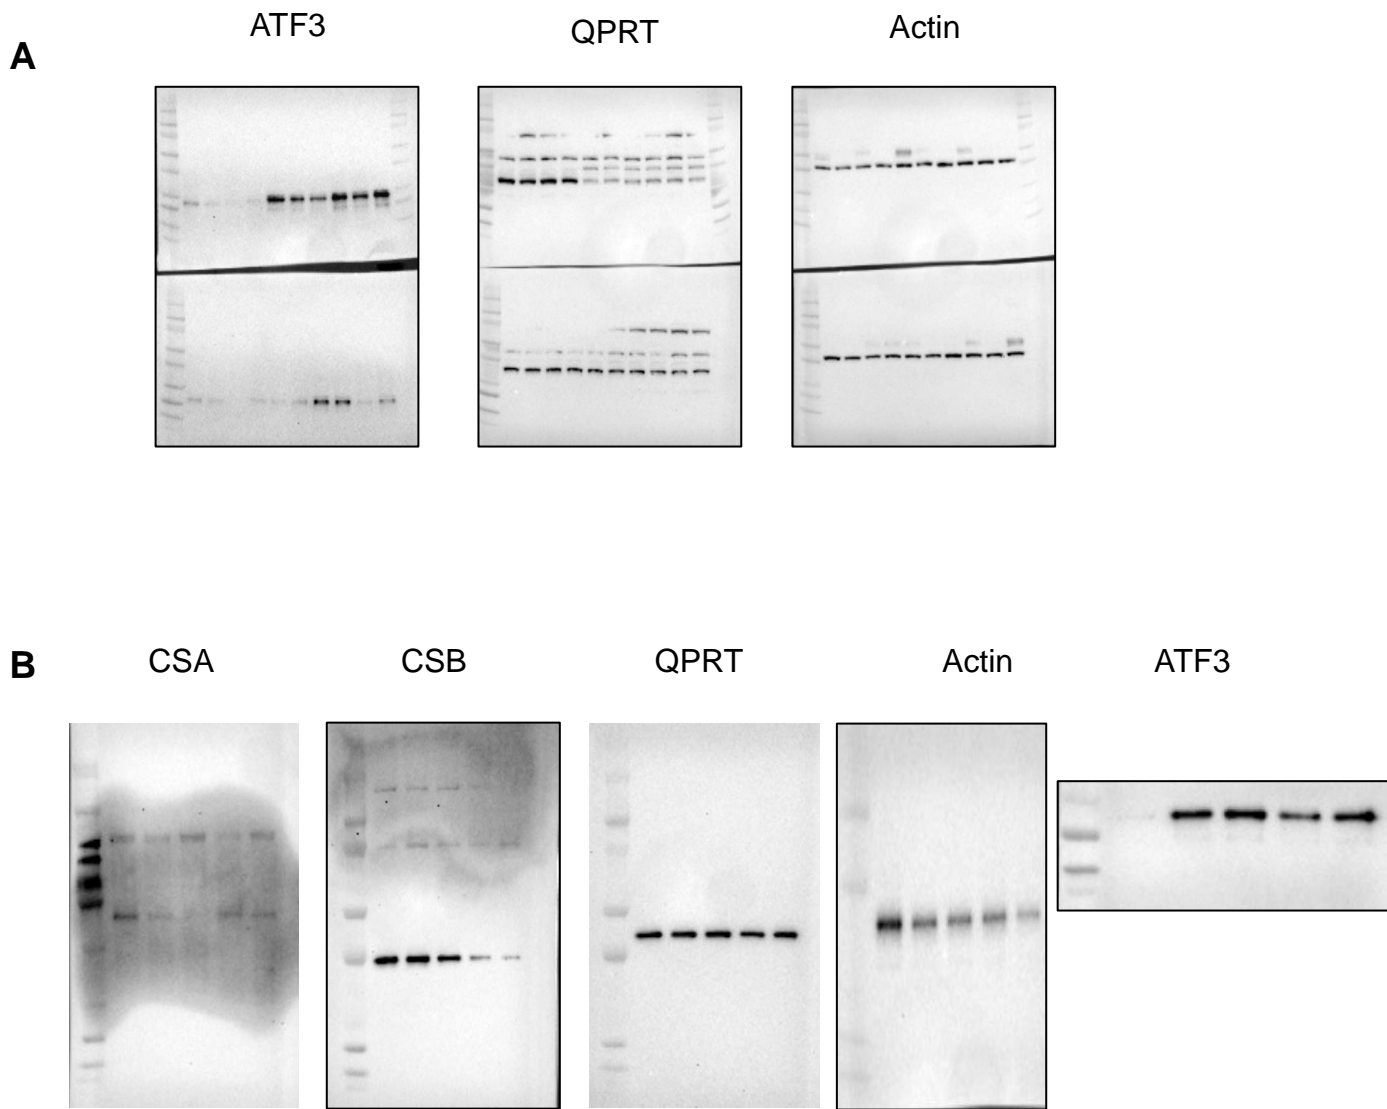**Supplementary Figure S7**

Uncropped images of western blot for figure 6 (A) Mouse Kidney tissues (B) HK-2 cells

# Supplementary Table S1

## Primers

| Primers                | Sequences (5'to 3')     |
|------------------------|-------------------------|
| CSA Forward            | GACCTTGAGAACTCCAGCAG    |
| CSA Reverse            | GTGTCATGAGGATACTACTGT   |
| CSB Forward            | TCTTGGCAGGTCTGAGCTA     |
| CSB Reverse            | TGCATCACTGTTGTTGGACA    |
| mACT Forward           | GATTACTGCTCTGGCTCCTAG   |
| mACT Reverse           | GACTCATCGTACTCCTGCTTG   |
| mATF3 Forward          | AGATGTCAGTCACCAAGTCTG   |
| mATF3 Reverse          | TGTCTTCTCCTTTTTCTTGTTCG |
| mQPRT Forward          | CATGCCACCGCTACGAC       |
| mQPRT Reverse          | GCTACATTCCACCTCTACCTTC  |
| mTIMP1 Forward         | AGACAGCCTTCTGCAACTC     |
| mTIMP1 Reverse         | CAGCCTTGAATCCTTTTAGCATC |
| mHAVCR1 Forward        | CTGCTACTGCTCCTTGTGAG    |
| mHAVCR1 Reverse        | GCGTTCGCAAAGCTTCAATC    |
| mLCN2 Forward          | CTACAATGTCACCTCCATCCTG  |
| mLCN2 Reverse          | CCTGTGCATATTTCCAGAGT    |
| hATF3 Forward          | GCTGGAATCAGTCACTGTCAG   |
| hATF3 Reverse          | CTTATTTCTTTCTCGTCGCCTCT |
| hGAPDH Forward         | ACATCGCTCAGACACCATG     |
| hGAPDH Reverse         | TGTAGTTGAGGTCAATGAAGGG  |
| ChIP Primer 1 Forward  | TCTCAGGAGTGGTGTGTT      |
| ChIP Primer 1 Reverse  | AGAAGGTCAATATTTCTGTGACA |
| ChIP Primer 2 Forward  | GGGAGGGCAGAGCTATTA      |
| ChIP Primer 2 Reverse  | CCTGGAGCTGTTGTGAAG      |
| ChIP Primer 3 Forward  | GTGGCTCACACCTGTAAT      |
| ChIP Primer 3 Reverse  | GACGAGGTTTCTCCATGTT     |
| ChIP Primer 4 Forward  | CTGGTGATGGTGAAGGATTAAC  |
| ChIP Primer 4 Reverse  | GCTGCTGCATTGCACTT       |
| ChIP Primer 5 Forward  | ATCACCTGGACAACCT        |
| ChIP Primer 5 Reverse  | AACAGCTTGAGGGAGAAATC    |
| ChIP Primer 6 Forward  | GCTTGAGCCCAACTCTG       |
| ChIP Primer 6 Reverse  | CCCATGTGGTTGATCCTTTA    |
| ChIP Primer 7 Forward  | AGCATTGATTCTTGATCCTCAT  |
| ChIP Primer 7 Reverse  | TTTCCAGGGATCCAGGTT      |
| ChIP Primer 8 Forward  | TACCGATGGACCACAGTC      |
| ChIP Primer 8 Reverse  | GGACAGAGCCACCAGAG       |
| ChIP Primer 9 Forward  | CCTGTAATCCCAGCACTTTG    |
| ChIP Primer 9 Reverse  | TTTCGCCATGTTGGTCAG      |
| ChIP Primer 10 Forward | CCCGTCTACTAAACATACCA    |
| ChIP Primer 10 Reverse | AACTCCTGACCTCATGATCC    |
